# Supplementary material for: Fibromyalgia: a new facet of the post-COVID-19 syndrome spectrum? Results from a web-based survey
Source: HighWire-hosted journal article supplement (doi:10.1136/rmdopen-2021-001735), 2021-08-01
Supplement: rmdopen-2021-001735supp001_data_supplement.pdf [file rmdopen-2021-001735supp001_data_supplement.pdf]

## SUPPLEMENTARY METHODS

### Linguistic validation

Forward translation from English to Italian was independently performed by two Italian native-speaking translators fluent in English. Discrepancies were discussed with the help of two additional researchers and resolved by consensus. The Italian questionnaires were then back-translated to English by two independent English native-speaking individuals unaware of the original English language scales. Discrepancies were discussed and resolved by consensus. The back-translated version was compared with the original questionnaire to ensure no major conceptual divergences were present. After obtaining informed consent, the tool was pre-tested on a target population of 20 consecutive patients recovered from COVID-19, evenly distributed between men and women. Respondents were asked to elaborate their thoughts about the meaning of each item and to explain how the answers were chosen. Comments about clarity of the terms and potentially confusing words were collected.

### Survey distribution strategy

First of all, an article about the survey was published on the official website of the promoting institution (IRCCS Istituto Ortopedico Rizzoli <http://www.ior.it>), a world-renowned musculoskeletal hospital, and posted on the official social network account. The link to the article was then reposted by researchers on their personal social network account at regular intervals, inviting personal Facebook friends meeting the characteristics to participate in the study and in turn forward the invitation onto their own Facebook friends. Secondly, members of the research group personally invited ~200 physicians dealing with COVID-19 to spread this questionnaire via email, mobile phone messages or their social network profile. Finally, since social networks have been successfully used to spread surveys, a link was regularly posted on Facebook groups related to COVID-19 by a dedicated professional collaborator (computer science engineer).

**Table S1.** Details of the original survey structure

| Question number | Question text                                                                                                                          | Type of question | Allowed response                                                                                                                                                                                                                                                                                                                                                                                                                         |
|-----------------|----------------------------------------------------------------------------------------------------------------------------------------|------------------|------------------------------------------------------------------------------------------------------------------------------------------------------------------------------------------------------------------------------------------------------------------------------------------------------------------------------------------------------------------------------------------------------------------------------------------|
| 1               | Età                                                                                                                                    | Short answer     | # Number                                                                                                                                                                                                                                                                                                                                                                                                                                 |
| 2               | Sesso                                                                                                                                  | Multiple choice  | <input type="radio"/> Uomo<br><input type="radio"/> Donna                                                                                                                                                                                                                                                                                                                                                                                |
| 3               | Stato civile                                                                                                                           | Multiple choice  | <input type="radio"/> Single<br><input type="radio"/> Coniugato/a o convivente<br><input type="radio"/> Separato/a<br><input type="radio"/> Vedovo/a                                                                                                                                                                                                                                                                                     |
| 4               | Attività lavorativa                                                                                                                    | Multiple choice  | <input type="radio"/> Studente/studentessa<br><input type="radio"/> Attualmente occupato/a<br><input type="radio"/> Disoccupato/a<br><input type="radio"/> Pensionato/a                                                                                                                                                                                                                                                                  |
| 5               | Ha avuto una diagnosi di COVID-19 CONFERMATA da un medico?                                                                             | Multiple choice  | <input type="radio"/> Sì<br><input type="radio"/> No                                                                                                                                                                                                                                                                                                                                                                                     |
| 6               | E' stato/a sottoposta ad un tampone nasale o nasofaringeo?                                                                             | Multiple choice  | <input type="radio"/> Sì, con esito positivo<br><input type="radio"/> Sì, con esito negativo<br><input type="radio"/> Non ho eseguito il tampone                                                                                                                                                                                                                                                                                         |
| 7               | Quali sintomi ha avuto durante la malattia acuta COVID-19?                                                                             | Checkbox         | <input type="checkbox"/> Nessun sintomo<br><input type="checkbox"/> Febbre<br><input type="checkbox"/> Tosse<br><input type="checkbox"/> Difficoltà respiratoria<br><input type="checkbox"/> Mal di testa<br><input type="checkbox"/> Dolore ai muscoli<br><input type="checkbox"/> Dolore alle articolazioni<br><input type="checkbox"/> Alterazioni del gusto e/o dell'olfatto<br><input type="checkbox"/> Diarrea o dolore addominale |
| 8               | Quanti mesi sono trascorsi da quando ha avuto la malattia COVID-19?                                                                    | Short answer     | # Number                                                                                                                                                                                                                                                                                                                                                                                                                                 |
| 9               | Dove è stato/a curato/a?                                                                                                               | Multiple choice  | <input type="radio"/> Non ho effettuato alcuna cura<br><input type="radio"/> Sono stato/a curato/a presso il mio domicilio<br><input type="radio"/> Sono stato/a ricoverato in ospedale (reparto ordinario)<br><input type="radio"/> Sono stato/a ricoverato in un reparto di rianimazione                                                                                                                                               |
| 10              | Quanti giorni sono durati i sintomi strettamente collegati alla malattia acuta COVID-19 (tosse, febbre, difficoltà respiratoria etc.)? | Short answer     | # Number                                                                                                                                                                                                                                                                                                                                                                                                                                 |
| 11*             | E' stato trattato con uno o più dei seguenti farmaci per COVID-19?                                                                     | Checkbox         | <input type="checkbox"/> Antidolorifici/antinfiammatori<br><input type="checkbox"/> Antibiotici                                                                                                                                                                                                                                                                                                                                          |

|            |                                                                                                                                                                                      |                                                    |                                                                                                                                                                                                                                                                                                                                                                                                                                                                                                                                                                                                                                                                                                                                                                                                           |
|------------|--------------------------------------------------------------------------------------------------------------------------------------------------------------------------------------|----------------------------------------------------|-----------------------------------------------------------------------------------------------------------------------------------------------------------------------------------------------------------------------------------------------------------------------------------------------------------------------------------------------------------------------------------------------------------------------------------------------------------------------------------------------------------------------------------------------------------------------------------------------------------------------------------------------------------------------------------------------------------------------------------------------------------------------------------------------------------|
|            |                                                                                                                                                                                      |                                                    | <input type="checkbox"/> Anticoagulanti (eparina)<br><input type="checkbox"/> Idrossiclorochina<br><input type="checkbox"/> Ossigeno                                                                                                                                                                                                                                                                                                                                                                                                                                                                                                                                                                                                                                                                      |
| <b>12*</b> | E' affetto da una o più di queste malattie? (è possibile selezionare più di una risposta)                                                                                            | Checkbox                                           | <input type="checkbox"/> Artrite reumatoide o altra forma di artrite<br><input type="checkbox"/> Lupus eritematoso sistemico, sclerosi sistemica, sindrome di Sjogren o altra forma di connettivite<br><input type="checkbox"/> Ansia<br><input type="checkbox"/> Depressione<br><input type="checkbox"/> Diabete<br><input type="checkbox"/> Ipertensione arteriosa<br><input type="checkbox"/> Malattie croniche dell'apparato respiratorio (es. BPCO, enfisema, asma)<br><input type="checkbox"/> Precedente infarto<br><input type="checkbox"/> Precedente ictus cerebrale<br><input type="checkbox"/> Altre malattie croniche neurologiche (es. epilessia, malattia di Parkinson, sclerosi multipla etc.)<br><input type="checkbox"/> Tumori solidi o ematologici (es. leucemia o linfoma)           |
| <b>13</b>  | Peso in kg                                                                                                                                                                           | Short answer                                       | # Number                                                                                                                                                                                                                                                                                                                                                                                                                                                                                                                                                                                                                                                                                                                                                                                                  |
| <b>14</b>  | Altezza in cm                                                                                                                                                                        | Short answer                                       | # Number                                                                                                                                                                                                                                                                                                                                                                                                                                                                                                                                                                                                                                                                                                                                                                                                  |
| <b>15</b>  | DOPO la malattia acuta COVID-19 e in particolare negli ultimi 3 mesi, ha avuto dolore muscolare, articolare o scheletrico diffuso (es. in diverse parti del corpo)?                  | Multiple choice                                    | <input type="radio"/> Sì<br><input type="radio"/> No                                                                                                                                                                                                                                                                                                                                                                                                                                                                                                                                                                                                                                                                                                                                                      |
| <b>16*</b> | Se ha risposto "Sì" alla domanda precedente, a che distanza (in giorni) dalla diagnosi di COVID-19 è comparsa la sintomatologia dolorosa? (se è comparsa contestualmente scriva "0") | Short answer                                       | # Number                                                                                                                                                                                                                                                                                                                                                                                                                                                                                                                                                                                                                                                                                                                                                                                                  |
| <b>17*</b> | Se ha risposto "Sì" alla domanda precedente, in quali di queste zone del corpo ha avuto dolore nell'ultima settimana? Segni TUTTE le zone in cui ha avuto dolore                     | Checkbox + graphic representation of painful sites | <input type="checkbox"/> Mandibola destra<br><input type="checkbox"/> Mandibola sinistra<br><input type="checkbox"/> Spalla destra<br><input type="checkbox"/> Spalla sinistra<br><input type="checkbox"/> Braccio destro<br><input type="checkbox"/> Braccio sinistro<br><input type="checkbox"/> Avambraccio destro<br><input type="checkbox"/> Avambraccio sinistro<br><input type="checkbox"/> Collo<br><input type="checkbox"/> Torace<br><input type="checkbox"/> Schiena (dorso)<br><input type="checkbox"/> Lombare<br><input type="checkbox"/> Anca o gluteo destro<br><input type="checkbox"/> Anca o gluteo sinistro<br><input type="checkbox"/> Coscia destra<br><input type="checkbox"/> Coscia sinistra<br><input type="checkbox"/> Gamba destra<br><input type="checkbox"/> Gamba sinistra |

|            |                                                                                                                                                                        |                          |                                                                                                                                                                                                                                                                                                                                                    |
|------------|------------------------------------------------------------------------------------------------------------------------------------------------------------------------|--------------------------|----------------------------------------------------------------------------------------------------------------------------------------------------------------------------------------------------------------------------------------------------------------------------------------------------------------------------------------------------|
| <b>18</b>  | Per ognuno dei seguenti sintomi, la preghiamo di indicare la descrizione che meglio si addice alla gravità del problema durante l'ULTIMA SETTIMANA:                    | Four-point Likert scale  | Items:<br>- Stanchezza<br>- Difficoltà di concentrazione<br>- Stanchezza al risveglio o sonno non riposante                                                                                                                                                                                                                                        |
| <b>19</b>  | DURANTE GLI ULTIMI 6 MESI ha avuto questi sintomi? La preghiamo di indicare i sintomi che ha avuto negli ultimi 6 mesi:                                                | Multiple choice          | Items:<br>- Mal di testa<br>- Dolore o crampi all'addome<br>- Depressione                                                                                                                                                                                                                                                                          |
| <b>20</b>  | Nell'ULTIMA SETTIMANA, è stato/a in grado di:                                                                                                                          | Seven-point Likert scale | Items:<br>- Andare a fare la spesa?<br>- Fare il bucato con la lavatrice?<br>- Preparare i pasti?<br>- Lavare i piatti?<br>- Passare l'aspirapolvere?<br>- Rifare i letti?<br>- Camminare per qualche isolato?<br>- Andare a far visita a parenti o amici?<br>- Fare lavori di giardinaggio/orto?<br>- Guidare l'automobile?<br>- Salire le scale? |
| <b>21</b>  | Quanti giorni, sui 7 della settimana, si è sentito/a bene?                                                                                                             | Seven-point Likert scale |                                                                                                                                                                                                                                                                                                                                                    |
| <b>22</b>  | Quanto è stato forte il suo dolore? Segni con un numero da 1 a 10 il valore che corrisponde a come si è sentito/a in generale nel corso dell'ultima settimana          | Ten-point Likert scale   |                                                                                                                                                                                                                                                                                                                                                    |
| <b>23</b>  | Quanto si è sentito/a stanco/a? Segni con un numero da 1 a 10 il valore che corrisponde a come si è sentito/a in generale nel corso dell'ultima settimana              | Ten-point Likert scale   |                                                                                                                                                                                                                                                                                                                                                    |
| <b>24</b>  | Come si è sentito/a al risveglio? Segni con un numero da 1 a 10 il valore che corrisponde a come si è sentito/a in generale nel corso dell'ultima settimana            | Ten-point Likert scale   |                                                                                                                                                                                                                                                                                                                                                    |
| <b>25</b>  | Quanto si è sentito/a rigido/a? Segni con un numero da 1 a 10 il valore che corrisponde a come si è sentito/a in generale nel corso dell'ultima settimana              | Ten-point Likert scale   |                                                                                                                                                                                                                                                                                                                                                    |
| <b>26</b>  | Quanto si è sentito/a ansioso/a o nervoso/a? Segni con un numero da 1 a 10 il valore che corrisponde a come si è sentito/a in generale nel corso dell'ultima settimana | Ten-point Likert scale   |                                                                                                                                                                                                                                                                                                                                                    |
| <b>27</b>  | Quanto si è sentito/a depresso/a o triste? Segni con un numero da 1 a 10 il valore che corrisponde a come si è sentito/a in generale nel corso dell'ultima settimana   | Ten-point Likert scale   |                                                                                                                                                                                                                                                                                                                                                    |
| <b>28*</b> | Ha manifestato PER LA PRIMA VOLTA (non presente in passato) qualcuno di questi sintomi negli ultimi 3 mesi?                                                            | Checkbox                 | <input type="checkbox"/> Stitichezza<br><input type="checkbox"/> Diarrea<br><input type="checkbox"/> Nausea o vomito<br><input type="checkbox"/> Reflusso gastroesofageo                                                                                                                                                                           |

- Dolore o bruciore di stomaco
- Sensazione di addormentamento o formicolio agli arti
- Vertigine o capogiro
- Insonnia
- Dolore al torace
- Visione sfocata
- Sensazione di febbre
- Secchezza alla bocca o agli occhi
- Prurito diffuso
- Sudorazione
- Rumori (sibili, fischi, ronzii) nelle orecchie o calo nell'udito
- Alterazioni del gusto o dell'olfatto
- Sensazione di fiato corto
- Perdita di appetito
- Perdita di capelli
- Fastidio/bruciore durante la minzione o aumento della frequenza

\* nonmandatory question

**Table S2.** Fibromyalgia Impact Questionnaire (FIQ) scores in fibromyalgia patients after stratification for hospitalization and treatment with supplemental oxygen.

|                                     | Hospitalized |             |         | Treated with supplemental oxygen |             |         |
|-------------------------------------|--------------|-------------|---------|----------------------------------|-------------|---------|
|                                     | No           | Yes         | P value | No                               | Yes         | P value |
| <b>FIQ Physical Impairment (PI)</b> | 4.1 ± 2.4    | 4.5 ± 2.4   | 0.579   | 4.2 ± 2.3                        | 4.2 ± 2.6   | 0.837   |
| <b>FIQ Feel good (FG)</b>           | 7.5 ± 2.3    | 7.9 ± 2.1   | 0.256   | 7.5 ± 2.3                        | 7.8 ± 2.2   | 0.377   |
| <b>FIQ Do work (DW)</b>             | 7.1 ± 1.9    | 7.6 ± 1.8   | 0.157   | 7.2 ± 1.9                        | 7.2 ± 1.8   | 0.887   |
| <b>FIQ Pain (P)</b>                 | 7.0 ± 1.7    | 7.1 ± 1.8   | 0.920   | 7.0 ± 1.8                        | 7.0 ± 1.5   | 0.710   |
| <b>FIQ Fatigue (F)</b>              | 8.1 ± 1.7    | 8.1 ± 1.7   | 0.136   | 8.1 ± 1.7                        | 8.1 ± 1.8   | 0.997   |
| <b>FIQ Rested (R)</b>               | 7.8 ± 2.0    | 7.6 ± 2.1   | 0.069   | 7.8 ± 2.0                        | 7.5 ± 2.2   | 0.261   |
| <b>FIQ Stiffness (S)</b>            | 7.2 ± 2.2    | 7.1 ± 2.8   | 0.710   | 7.3 ± 2.1                        | 6.5 ± 3.1   | 0.006   |
| <b>FIQ Anxiety (A)</b>              | 6.9 ± 2.7    | 6.8 ± 2.7   | 0.850   | 6.9 ± 2.6                        | 6.5 ± 2.8   | 0.214   |
| <b>FIQ Depression (D)</b>           | 6.0 ± 3.0    | 6.0 ± 3.1   | 0.888   | 6.0 ± 3.0                        | 5.9 ± 3.3   | 0.785   |
| <b>FIQ Total Score</b>              | 68.5 ± 12.8  | 69.7 ± 13.1 | 0.979   | 69.1 ± 12.5                      | 67.2 ± 14.1 | 0.312   |

Data are presented as mean ± standard deviation

**Table S3.** Comparison between female and male respondents.

|                                                               | Females    | Males      | Weighted P value |
|---------------------------------------------------------------|------------|------------|------------------|
| <b>Age, years</b>                                             | 45 ± 12    | 45 ± 13    | 0.211            |
| <b>COVID-19 symptoms</b>                                      |            |            |                  |
| Fever, n (%)                                                  | 325 (68.1) | 104 (74.8) | 0.078            |
| Cough, n (%)                                                  | 225 (47.2) | 67 (48.2)  | 0.798            |
| Dyspnoea, n (%)                                               | 185 (38.8) | 52 (37.4)  | 0.724            |
| Headache, n (%)                                               | 319 (66.9) | 71 (51.1)  | < 0.0001         |
| Myalgia, n (%)                                                | 353 (74.0) | 83 (59.7)  | < 0.0001         |
| Arthralgia, n (%)                                             | 335 (70.2) | 69 (49.6)  | < 0.0001         |
| Anosmia or ageusia, n (%)                                     | 354 (74.2) | 83 (59.7)  | < 0.0001         |
| Abdominal pain                                                | 194 (40.8) | 35 (25.2)  | < 0.0001         |
| <b>Treatment setting</b>                                      |            |            |                  |
| No treatment, n (%)                                           | 123 (25.8) | 42 (30.2)  |                  |
| Home treatment, n (%)                                         | 304 (63.7) | 71 (51.1)  | <0.0001          |
| Hospital admission, n (%)                                     | 44 (9.2)   | 22 (15.8)  | 0.001            |
| ICU admission, n (%)                                          | 6 (1.3)    | 4 (2.9)    | 0.236            |
| <b>COVID-19 duration, n (%)</b>                               | 14 (7-20)  | 10 (6-16)  | 0.820            |
| <b>COVID-19 treatment</b>                                     |            |            |                  |
| Analgesics/NSAIDs, n (%)                                      | 330 (69.2) | 92 (66.2)  | 0.451            |
| Antibiotics and/or antivirals, n (%)                          | 218 (45.7) | 58 (41.7)  | 0.322            |
| LMWH, n (%)                                                   | 97 (20.3)  | 34 (24.5)  | 0.217            |
| Hydroxychloroquine, n (%)                                     | 43 (9.0)   | 10 (7.2)   | 0.459            |
| Supplemental oxygen, n (%)                                    | 47 (9.9)   | 19 (13.7)  | 0.138            |
| <b>Pre-existent comorbid diseases</b>                         |            |            |                  |
| Rheumatoid arthritis or other inflammatory arthritides, n (%) | 27 (5.7)   | 3 (2.2)    | 0.030            |
| Connective tissue diseases, n (%)                             | 3 (0.6)    | 0 (0.0)    | 0.185            |
| Anxiety, n (%)                                                | 83 (17.4)  | 25 (18.0)  | 0.851            |
| Depression, n (%)                                             | 26 (5.5)   | 10 (7.2)   | 0.354            |
| Diabetes, n (%)                                               | 8 (1.7)    | 2 (1.4)    | 0.891            |
| High blood pressure, n (%)                                    | 69 (14.5)  | 28 (20.1)  | 0.071            |
| Chronic pulmonary diseases, n (%)                             | 43 (9.0)   | 9 (6.5)    | 0.279            |

|                                         |                   |                   |                   |
|-----------------------------------------|-------------------|-------------------|-------------------|
| History of myocardial infarction, n (%) | 1 (0.2)           | 2 (1.4)           | 0.134             |
| History of stroke, n (%)                | 2 (0.04)          | 0 (0.0)           | 0.349             |
| Other neurological diseases, n (%)      | 3 (0.6)           | 0 (0.0)           | 0.185             |
| Malignancy, n (%)                       | 4 (0.8)           | 1 (0.7)           | 0.763             |
| <b>BMI, kg/m<sup>2</sup></b>            | <b>24.9 ± 4.9</b> | <b>26.3 ± 4.3</b> | <b>&lt;0.0001</b> |
| <b>BMI category</b>                     |                   |                   |                   |
| Normal weight, n (%)                    | 274 (57.4)        | 61 (43.9)         | <b>0.005</b>      |
| Overweight, n (%)                       | 110 (23.1)        | 50 (36.0)         | <b>0.002</b>      |
| Obese, n (%)                            | 75 (15.7)         | 27 (19.4)         | 0.694             |

**Legend:** COVID-19, coronavirus disease 2019; LMWH, low-molecular-weight heparin; NSAIDs, Nonsteroidal anti-inflammatory drugs.
